# Supplementary material for: PolyCat: A Resource for Genome Categorization of Sequencing Reads From Allopolyploid Organisms
Source: PubMed Central journal article supplement (PMC3583458; doi:10.1534/g3.112.005298), 2013-03-01
Supplement: supp_3.3.517_005298SI.pdf [file supp_3.3.517_005298SI.pdf]

## **PolyCat: A Resource for Genome Categorization of Sequencing Reads from Allopolyploid Organisms**

Justin T. Page<sup>\*</sup>, Alan R. Gingle<sup>§</sup>, and Joshua A. Udall<sup>\*</sup>

<sup>\*</sup> Plant and Wildlife Science Department, Brigham Young University, Provo, UT, 84062

<sup>§</sup> Plant Genome Mapping Laboratory, University of Georgia, Athens, Georgia, 30602, USA

**DOI: 10.1534/g3.112.005298**

**Table S1 Transitions and Transversions in Cotton SNP index and Maize HapMaps 1 and 2.**

|                     | <b>Cotton</b>    |              | <b>Maize (gen 1)</b> |              | <b>Maize (gen 2)</b> |              |
|---------------------|------------------|--------------|----------------------|--------------|----------------------|--------------|
| C/T                 | 770,845          | 29.7%        | 17,342,963           | 25.0%        | 16,980,248           | 33.5%        |
| G/A                 | 772,668          | 29.7%        | 10,604,324           | 25.6%        | 17,187,326           | 33.9%        |
| <b>Transition</b>   | <b>1,543,513</b> | <b>59.4%</b> | <b>27,947,287</b>    | <b>50.6%</b> | <b>34,167,574</b>    | <b>67.4%</b> |
| C/G                 | 174,412          | 6.7%         | 3,177,765            | 9.2%         | 3,114,389            | 6.1%         |
| A/T                 | 381,403          | 14.7%        | 4,530,516            | 7.8%         | 4,430,958            | 8.7%         |
| C/A                 | 249,792          | 9.6%         | 4,630,754            | 15.4%        | 4,517,629            | 8.9%         |
| T/G                 | 249,872          | 9.6%         | 4,520,730            | 16.9%        | 4,436,275            | 8.8%         |
| <b>Transversion</b> | <b>1,055,479</b> | <b>40.6%</b> | <b>16,859,765</b>    | <b>49.4%</b> | <b>16,499,251</b>    | <b>32.6%</b> |
| <b>Total</b>        | <b>2,598,992</b> |              | <b>44,807,052</b>    |              | <b>50,666,825</b>    |              |

**Table S2** Distribution of SNPs (homoeo- and allele-SNPs) across chromosomes.

| <b>Chromosome</b> | <b>Length (Mbp)</b> | <b>SNPs</b> | <b>SNPs/Kbp</b> | <b>% of total SNPs</b> | <b>Covered</b> | <b>Genic Length (Mbp)</b> | <b>Covered</b> |
|-------------------|---------------------|-------------|-----------------|------------------------|----------------|---------------------------|----------------|
| Chr01             | 55.87               | 207,630     | 3.71            | 7.8                    | 23.10%         | 8.72                      | 61.00%         |
| Chr02             | 62.77               | 198,479     | 3.16            | 7.5                    | 20.00%         | 8.99                      | 58.30%         |
| Chr03             | 45.77               | 146,056     | 3.19            | 5.5                    | 20.10%         | 6.06                      | 59.50%         |
| Chr04             | 62.18               | 215,057     | 3.45            | 8.1                    | 21.50%         | 9.56                      | 61.70%         |
| Chr05             | 64.14               | 188,071     | 2.93            | 7.1                    | 19.00%         | 8.87                      | 58.30%         |
| Chr06             | 51.07               | 218,317     | 4.27            | 8.2                    | 25.30%         | 9.27                      | 62.80%         |
| Chr07             | 60.98               | 259,995     | 4.26            | 9.8                    | 25.40%         | 12.18                     | 63.10%         |
| Chr08             | 57.13               | 216,505     | 3.78            | 8.2                    | 23.50%         | 9.75                      | 62.70%         |
| Chr09             | 70.71               | 312,723     | 4.42            | 11.8                   | 25.80%         | 14.87                     | 63.60%         |
| Chr10             | 62.18               | 182,100     | 2.92            | 6.9                    | 18.60%         | 8.36                      | 57.80%         |
| Chr11             | 62.68               | 202,334     | 3.22            | 7.6                    | 20.30%         | 9.59                      | 58.70%         |
| Chr12             | 35.43               | 120,941     | 3.41            | 4.5                    | 21.50%         | 6.09                      | 57.70%         |
| Chr13             | 58.32               | 165,481     | 2.83            | 6.2                    | 18.40%         | 8.64                      | 58.40%         |

**Table S3** Heterozygous genes in *G. hirsutum* and *G. tomentosum*.

|                                      | <b># Heterozygous Genes</b> | <b>Number of genes containing allele-SNPs in the SNP index</b> | <b>Number of genes containing allele-SNPs found within the polyploid alignments (not in index)</b> |
|--------------------------------------|-----------------------------|----------------------------------------------------------------|----------------------------------------------------------------------------------------------------|
| <i>G. hirsutum</i> -A <sub>T</sub>   | 749                         | 224                                                            | 558                                                                                                |
| <i>G. hirsutum</i> -D <sub>T</sub>   | 923                         | 270                                                            | 702                                                                                                |
| <i>G. tomentosum</i> -A <sub>T</sub> | 775                         | 242                                                            | 578                                                                                                |
| <i>G. tomentosum</i> -D <sub>T</sub> | 962                         | 275                                                            | 738                                                                                                |
