# Supplementary material for: PolyCat: A Resource for Genome Categorization of Sequencing Reads From Allopolyploid Organisms
Source: PubMed Central journal article supplement (PMC3583458; doi:10.1534/g3.112.005298), 2013-03-01
Supplement: supp_3.3.517_TableS1.pdf [file supp_3.3.517_TableS1.pdf]

**Table S1 Transitions and Transversions in Cotton SNP index and Maize HapMaps 1 and 2.**

|                     | <b>Cotton</b>    |              | <b>Maize (gen 1)</b> |              | <b>Maize (gen 2)</b> |              |
|---------------------|------------------|--------------|----------------------|--------------|----------------------|--------------|
| C/T                 | 770,845          | 29.7%        | 17,342,963           | 25.0%        | 16,980,248           | 33.5%        |
| G/A                 | 772,668          | 29.7%        | 10,604,324           | 25.6%        | 17,187,326           | 33.9%        |
| <b>Transition</b>   | <b>1,543,513</b> | <b>59.4%</b> | <b>27,947,287</b>    | <b>50.6%</b> | <b>34,167,574</b>    | <b>67.4%</b> |
| C/G                 | 174,412          | 6.7%         | 3,177,765            | 9.2%         | 3,114,389            | 6.1%         |
| A/T                 | 381,403          | 14.7%        | 4,530,516            | 7.8%         | 4,430,958            | 8.7%         |
| C/A                 | 249,792          | 9.6%         | 4,630,754            | 15.4%        | 4,517,629            | 8.9%         |
| T/G                 | 249,872          | 9.6%         | 4,520,730            | 16.9%        | 4,436,275            | 8.8%         |
| <b>Transversion</b> | <b>1,055,479</b> | <b>40.6%</b> | <b>16,859,765</b>    | <b>49.4%</b> | <b>16,499,251</b>    | <b>32.6%</b> |
| <b>Total</b>        | <b>2,598,992</b> |              | <b>44,807,052</b>    |              | <b>50,666,825</b>    |              |
