# Supplementary material for: PolyCat: A Resource for Genome Categorization of Sequencing Reads From Allopolyploid Organisms
Source: PubMed Central journal article supplement (PMC3583458; doi:10.1534/g3.112.005298), 2013-03-01
Supplement: supp_3.3.517_TableS2.pdf [file supp_3.3.517_TableS2.pdf]

**Table S2** Distribution of SNPs (homoeo- and allele-SNPs) across chromosomes.

| <b>Chromosome</b> | <b>Length (Mbp)</b> | <b>SNPs</b> | <b>SNPs/Kbp</b> | <b>% of total SNPs</b> | <b>Covered</b> | <b>Genic Length (Mbp)</b> | <b>Covered</b> |
|-------------------|---------------------|-------------|-----------------|------------------------|----------------|---------------------------|----------------|
| Chr01             | 55.87               | 207,630     | 3.71            | 7.8                    | 23.10%         | 8.72                      | 61.00%         |
| Chr02             | 62.77               | 198,479     | 3.16            | 7.5                    | 20.00%         | 8.99                      | 58.30%         |
| Chr03             | 45.77               | 146,056     | 3.19            | 5.5                    | 20.10%         | 6.06                      | 59.50%         |
| Chr04             | 62.18               | 215,057     | 3.45            | 8.1                    | 21.50%         | 9.56                      | 61.70%         |
| Chr05             | 64.14               | 188,071     | 2.93            | 7.1                    | 19.00%         | 8.87                      | 58.30%         |
| Chr06             | 51.07               | 218,317     | 4.27            | 8.2                    | 25.30%         | 9.27                      | 62.80%         |
| Chr07             | 60.98               | 259,995     | 4.26            | 9.8                    | 25.40%         | 12.18                     | 63.10%         |
| Chr08             | 57.13               | 216,505     | 3.78            | 8.2                    | 23.50%         | 9.75                      | 62.70%         |
| Chr09             | 70.71               | 312,723     | 4.42            | 11.8                   | 25.80%         | 14.87                     | 63.60%         |
| Chr10             | 62.18               | 182,100     | 2.92            | 6.9                    | 18.60%         | 8.36                      | 57.80%         |
| Chr11             | 62.68               | 202,334     | 3.22            | 7.6                    | 20.30%         | 9.59                      | 58.70%         |
| Chr12             | 35.43               | 120,941     | 3.41            | 4.5                    | 21.50%         | 6.09                      | 57.70%         |
| Chr13             | 58.32               | 165,481     | 2.83            | 6.2                    | 18.40%         | 8.64                      | 58.40%         |
