# Supplementary material for: PolyCat: A Resource for Genome Categorization of Sequencing Reads From Allopolyploid Organisms
Source: PubMed Central journal article supplement (PMC3583458; doi:10.1534/g3.112.005298), 2013-03-01
Supplement: supp_3.3.517_TableS3.pdf [file supp_3.3.517_TableS3.pdf]

**Table S3** Heterozygous genes in *G. hirsutum* and *G. tomentosum*.

|                                      | <b># Heterozygous Genes</b> | <b>Number of genes containing allele-SNPs in the SNP index</b> | <b>Number of genes containing allele-SNPs found within the polyploid alignments (not in index)</b> |
|--------------------------------------|-----------------------------|----------------------------------------------------------------|----------------------------------------------------------------------------------------------------|
| <i>G. hirsutum</i> -A <sub>T</sub>   | 749                         | 224                                                            | 558                                                                                                |
| <i>G. hirsutum</i> -D <sub>T</sub>   | 923                         | 270                                                            | 702                                                                                                |
| <i>G. tomentosum</i> -A <sub>T</sub> | 775                         | 242                                                            | 578                                                                                                |
| <i>G. tomentosum</i> -D <sub>T</sub> | 962                         | 275                                                            | 738                                                                                                |
